# Supplementary material for: Impacts of climate change on crop evapotranspiration with ensemble GCM projections in the North China Plain
Source: Springer Nature journal article supplement (doi:10.1007/s10584-013-0823-3), 2013-07-06
Supplement: MOESM1 [file 10584_2013_823_MOESM1_ESM.doc]

Appendix References:

Bernacchi CJ, Kimball BA, Quarles DR, Long SP, Ort DR (2007) Decreases in stomatal conductance of soybean under open air elevation of [CO2] are closely coupled with decreases in ecosystem evapotranspiration. Plant Physiol 143, 134–144.

Challinor AJ, Wheeler TR, Craufurd PQ, Ferro CAT, Stephenson DB (2007) Adaptation of crops to climate change through genotypic responses to mean and extreme temperatures. Agric Ecosys Environ 119, 190–204.

Egli DB (2008) Comparison of corn and soybean yields in the United States: historical trends and future prospects. Agron J 100, S79–S88.

Gao G, Xu CY, Chen D (2011) Spatial and temporal characteristics of actual evapotranspiration over Haihe River basin in China. Stoch Environ Res Risk Assess, DOI 10.1007/s00477-011-0525-1, 26(5), 655-669.

Huntingford C, Lambert FH, Gash JHC, Taylor CM and Challinor AJ (2005) Aspects of climate change prediction relevant to crop productivity. Phil Trans R Soc B 360, 1999–2009.

Polley, HW (2002) Implications of Atmospheric and Climatic Change for Crop Yield and Water Use Efficiency. Crop Sci 42,131–140.

Tao F, Zhang Z (2010) Adaptation of maize production to climate change in North China Plain: Quantify the relative contributions of adaptation options. Europ J Agron 33, 103–116.

Tubiello FN, Soussana JF, Howden SM (2007) Crop and pasture response to climate change. Proc Natl Acad Sci USA 104, 19,686–19,690.
